# Supplementary material
Source: MDPI journal article supplement (https://www.mdpi.com/2071-1050/16/10/3948)
Supplement: s1 [file s1]

[illegible]







[illegible]



|               |    |                      | 10.07.2019 Q = 0.109 m <sup>3</sup> ·s <sup>-1</sup> |        |        |        |        |        |        |        |    |   |
|---------------|----|----------------------|------------------------------------------------------|--------|--------|--------|--------|--------|--------|--------|----|---|
|               |    |                      | Hydrometric verticals                                |        |        |        |        |        |        |        |    |   |
| Cross-section |    |                      | I                                                    | II     | III    | IV     | V      | VI     | VII    | VIII   | IX | X |
| 1             | V* | [m·s <sup>-1</sup> ] | 0,0107                                               |        | 0,0038 |        | 0,0007 |        | 0,0004 |        |    |   |
|               | t  | [N·m <sup>-2</sup> ] | 0,1155                                               |        | 0,0146 |        | 0,0005 |        | 0,0002 |        |    |   |
| 2             | V* | [m·s <sup>-1</sup> ] | 0,0017                                               |        | 0,0013 |        | 0,0049 |        |        |        |    |   |
|               | t  | [N·m <sup>-2</sup> ] | 0,0029                                               |        | 0,0017 |        | 0,0241 |        |        |        |    |   |
| 3             | V* | [m·s <sup>-1</sup> ] | 0,0024                                               |        | 0,0028 |        | 0,0049 |        |        |        |    |   |
|               | t  | [N·m <sup>-2</sup> ] | 0,0058                                               |        | 0,0079 |        | 0,0241 |        |        |        |    |   |
| 4             | V* | [m·s <sup>-1</sup> ] | 0,0078                                               |        | 0,0034 |        | 0,0078 |        | 0,0020 |        |    |   |
|               | t  | [N·m <sup>-2</sup> ] | 0,0607                                               |        | 0,0119 |        | 0,0607 |        | 0,0041 |        |    |   |
| 6             | V* | [m·s <sup>-1</sup> ] | 0,0011                                               | 0,0018 | 0,0038 | 0,0059 | 0,0042 | 0,0353 | 0,0075 |        |    |   |
|               | t  | [N·m <sup>-2</sup> ] | 0,0013                                               | 0,0031 | 0,0145 | 0,0352 | 0,0180 | 1,2452 | 0,0557 |        |    |   |
| 8             | V* | [m·s <sup>-1</sup> ] | 0,0063                                               | 0,0032 | 0,0072 | 0,0152 | 0,0053 | 0,0097 | 0,0084 | 0,0013 |    |   |
|               | t  | [N·m <sup>-2</sup> ] | 0,0396                                               | 0,0104 | 0,0516 | 0,2310 | 0,0278 | 0,0932 | 0,0700 | 0,0017 |    |   |
| 10            | V* | [m·s <sup>-1</sup> ] | 0,0038                                               | 0,0360 | 0,0103 | 0,0087 | 0,0057 | 0,0014 | 0,0016 |        |    |   |
|               | t  | [N·m <sup>-2</sup> ] | 0,0145                                               | 1,2973 | 0,1060 | 0,0753 | 0,0323 | 0,0020 | 0,0026 |        |    |   |
| 11            | V* | [m·s <sup>-1</sup> ] | 0,0026                                               |        | 0,0257 |        | 0,0027 |        | 0,0006 |        |    |   |
|               | t  | [N·m <sup>-2</sup> ] | 0,0065                                               |        | 0,6625 |        | 0,0076 |        | 0,0004 |        |    |   |
| 12            | V* | [m·s <sup>-1</sup> ] | 0,0045                                               |        | 0,0014 |        | 0,0091 |        | 0,0006 |        |    |   |
|               | t  | [N·m <sup>-2</sup> ] | 0,0201                                               |        | 0,0018 |        | 0,0834 |        | 0,0004 |        |    |   |
| 13            | V* | [m·s <sup>-1</sup> ] | 0,0016                                               | 0,0051 | 0,0096 | 0,0023 | 0,0036 | 0,0047 | 0,0022 |        |    |   |
|               | t  | [N·m <sup>-2</sup> ] | 0,0026                                               | 0,0261 | 0,0918 | 0,0055 | 0,0130 | 0,0222 | 0,0048 |        |    |   |
| 15            | V* | [m·s <sup>-1</sup> ] | 0,0122                                               | 0,0117 | 0,0095 | 0,0092 | 0,0003 | 0,0010 |        |        |    |   |
|               | t  | [N·m <sup>-2</sup> ] | 0,1482                                               | 0,1370 | 0,0912 | 0,0853 | 0,0001 | 0,0010 |        |        |    |   |
| 17            | V* | [m·s <sup>-1</sup> ] | 0,0050                                               | 0,0050 | 0,0065 | 0,0043 | 0,0035 | 0,0142 |        |        |    |   |
|               | t  | [N·m <sup>-2</sup> ] | 0,0249                                               | 0,0253 | 0,0428 | 0,0185 | 0,0121 | 0,2004 |        |        |    |   |
| 18            | V* | [m·s <sup>-1</sup> ] | 0,0009                                               |        | 0,0048 |        | 0,0026 |        | 0,0035 |        |    |   |
|               | t  | [N·m <sup>-2</sup> ] | 0,0008                                               |        | 0,0232 |        | 0,0070 |        | 0,0125 |        |    |   |
| 19            | V* | [m·s <sup>-1</sup> ] | 0,0008                                               |        | 0,0046 |        | 0,0088 |        |        |        |    |   |
|               | t  | [N·m <sup>-2</sup> ] | 0,0006                                               |        | 0,0212 |        | 0,0768 |        |        |        |    |   |
| 20            | V* | [m·s <sup>-1</sup> ] | 0,0054                                               | 0,0094 | 0,0106 | 0,0096 | 0,0214 |        |        |        |    |   |
|               | t  | [N·m <sup>-2</sup> ] | 0,0287                                               | 0,0882 | 0,1133 | 0,0918 | 0,4576 |        |        |        |    |   |
| 22            | V* | [m·s <sup>-1</sup> ] | 0,0009                                               | 0,0067 | 0,0066 | 0,0188 | 0,0100 | 0,0131 | 0,0004 |        |    |   |
|               | t  | [N·m <sup>-2</sup> ] | 0,0008                                               | 0,0453 | 0,0432 | 0,3547 | 0,1000 | 0,1715 | 0,0002 |        |    |   |
| 24            | V* | [m·s <sup>-1</sup> ] | 0,0072                                               | 0,0049 | 0,0074 | 0,0116 | 0,0006 | 0,0018 |        |        |    |   |
|               | t  | [N·m <sup>-2</sup> ] | 0,0513                                               | 0,0237 | 0,0554 | 0,1350 | 0,0003 | 0,0033 |        |        |    |   |
| 26            | V* | [m·s <sup>-1</sup> ] | 0,0171                                               |        | 0,0029 |        | 0,0004 |        |        |        |    |   |
|               | t  | [N·m <sup>-2</sup> ] | 0,2935                                               |        | 0,0085 |        | 0,0001 |        |        |        |    |   |
| 27            | V* | [m·s <sup>-1</sup> ] | 0,0020                                               |        | 0,0124 |        | 0,0053 |        |        |        |    |   |
|               | t  | [N·m <sup>-2</sup> ] | 0,0040                                               |        | 0,1538 |        | 0,0280 |        |        |        |    |   |
| 28            | V* | [m·s <sup>-1</sup> ] | 0,0020                                               |        | 0,0021 |        | 0,0035 |        | 0,0004 |        |    |   |
|               | t  | [N·m <sup>-2</sup> ] | 0,0039                                               |        | 0,0045 |        | 0,0121 |        | 0,0001 |        |    |   |

|               |    |                      | 29.08.2019 Q = 0.063 m <sup>3</sup> ·s <sup>-1</sup> |        |        |        |        |        |        |      |    |   |
|---------------|----|----------------------|------------------------------------------------------|--------|--------|--------|--------|--------|--------|------|----|---|
|               |    |                      | Hydrometric verticals                                |        |        |        |        |        |        |      |    |   |
| Cross-section |    |                      | I                                                    | II     | III    | IV     | V      | VI     | VII    | VIII | IX | X |
| 1             | V* | [m·s <sup>-1</sup> ] | 0,0091                                               |        | 0,0062 |        | 0,0107 |        |        |      |    |   |
|               | t  | [N·m <sup>-2</sup> ] | 0,0824                                               |        | 0,0385 |        | 0,1140 |        |        |      |    |   |
| 2             | V* | [m·s <sup>-1</sup> ] | 0,0010                                               |        | 0,0285 |        | 0,0220 |        |        |      |    |   |
|               | t  | [N·m <sup>-2</sup> ] | 0,0011                                               |        | 0,8095 |        | 0,4825 |        |        |      |    |   |
| 3             | V* | [m·s <sup>-1</sup> ] | 0,0011                                               |        | 0,0026 |        | 0,0063 |        |        |      |    |   |
|               | t  | [N·m <sup>-2</sup> ] | 0,0013                                               |        | 0,0069 |        | 0,0399 |        |        |      |    |   |
| 4             | V* | [m·s <sup>-1</sup> ] |                                                      |        | 0,0026 |        | 0,0154 |        | 0,0029 |      |    |   |
|               | t  | [N·m <sup>-2</sup> ] |                                                      |        | 0,0067 |        | 0,2385 |        | 0,0084 |      |    |   |
| 6             | V* | [m·s <sup>-1</sup> ] | 0,0034                                               | 0,0057 | 0,0108 | 0,0179 | 0,0231 | 0,0041 | 0,0060 |      |    |   |
|               | t  | [N·m <sup>-2</sup> ] | 0,0114                                               | 0,0329 | 0,1170 | 0,3203 | 0,5358 | 0,0167 | 0,0358 |      |    |   |
| 8             | V* | [m·s <sup>-1</sup> ] | 0,0018                                               | 0,0006 | 0,0253 | 0,0065 | 0,0019 | 0,0003 | 0,0013 |      |    |   |
|               | t  | [N·m <sup>-2</sup> ] | 0,0031                                               | 0,0004 | 0,6394 | 0,0421 | 0,0035 | 0,0001 | 0,0017 |      |    |   |
| 10            | V* | [m·s <sup>-1</sup> ] | 0,0042                                               | 0,0054 | 0,0119 | 0,0085 | 0,0063 | 0,0041 |        |      |    |   |
|               | t  | [N·m <sup>-2</sup> ] | 0,0174                                               | 0,0287 | 0,1428 | 0,0729 | 0,0401 | 0,0167 |        |      |    |   |
| 11            | V* | [m·s <sup>-1</sup> ] | 0,0002                                               |        | 0,0094 |        | 0,0022 |        | 0,0003 |      |    |   |
|               | t  | [N·m <sup>-2</sup> ] | 0,0001                                               |        | 0,0885 |        | 0,0047 |        | 0,0001 |      |    |   |
| 12            | V* | [m·s <sup>-1</sup> ] | 0,0024                                               |        | 0,0091 |        | 0,0021 |        |        |      |    |   |
|               | t  | [N·m <sup>-2</sup> ] | 0,0056                                               |        | 0,0830 |        | 0,0044 |        |        |      |    |   |
| 13            | V* | [m·s <sup>-1</sup> ] | 0,0135                                               | 0,0145 | 0,0130 | 0,0111 | 0,0051 | 0,0018 |        |      |    |   |
|               | t  | [N·m <sup>-2</sup> ] | 0,1826                                               | 0,2109 | 0,1688 | 0,1243 | 0,0263 | 0,0031 |        |      |    |   |
| 15            | V* | [m·s <sup>-1</sup> ] | 0,0053                                               | 0,0081 | 0,0017 | 0,0072 | 0,0029 | 0,0013 |        |      |    |   |
|               | t  | [N·m <sup>-2</sup> ] | 0,0278                                               | 0,0651 | 0,0030 | 0,0516 | 0,0086 | 0,0016 |        |      |    |   |
| 17            | V* | [m·s <sup>-1</sup> ] | 0,0048                                               | 0,0067 | 0,0082 | 0,0110 | 0,0018 |        |        |      |    |   |
|               | t  | [N·m <sup>-2</sup> ] | 0,0234                                               | 0,0444 | 0,0668 | 0,1204 | 0,0033 |        |        |      |    |   |
| 18            | V* | [m·s <sup>-1</sup> ] | 0,0011                                               |        | 0,0018 |        | 0,0073 |        | 0,0009 |      |    |   |
|               | t  | [N·m <sup>-2</sup> ] | 0,0011                                               |        | 0,0031 |        | 0,0539 |        | 0,0008 |      |    |   |
| 19            | V* | [m·s <sup>-1</sup> ] | 0,0051                                               |        |        |        | 0,0092 |        |        |      |    |   |
|               | t  | [N·m <sup>-2</sup> ] | 0,0265                                               |        |        |        | 0,0853 |        |        |      |    |   |
| 20            | V* | [m·s <sup>-1</sup> ] | 0,0110                                               | 0,0067 | 0,0028 | 0,0051 |        |        |        |      |    |   |
|               | t  | [N·m <sup>-2</sup> ] | 0,1204                                               | 0,0444 | 0,0079 | 0,0258 |        |        |        |      |    |   |
| 22            | V* | [m·s <sup>-1</sup> ] | 0,0009                                               | 0,0134 | 0,0119 | 0,0091 | 0,0106 |        |        |      |    |   |
|               | t  | [N·m <sup>-2</sup> ] | 0,0008                                               | 0,1793 | 0,1407 | 0,0824 | 0,1129 |        |        |      |    |   |
| 24            | V* | [m·s <sup>-1</sup> ] | 0,0111                                               | 0,0154 | 0,0110 | 0,0027 | 0,0008 |        |        |      |    |   |
|               | t  | [N·m <sup>-2</sup> ] | 0,1243                                               | 0,2364 | 0,1220 | 0,0073 | 0,0006 |        |        |      |    |   |
| 26            | V* | [m·s <sup>-1</sup> ] | 0,0015                                               |        | 0,0023 |        | 0,0004 |        |        |      |    |   |
|               | t  | [N·m <sup>-2</sup> ] | 0,0023                                               |        | 0,0053 |        | 0,0001 |        |        |      |    |   |
| 27            | V* | [m·s <sup>-1</sup> ] | 0,0002                                               |        | 0,0047 |        | 0,0043 |        |        |      |    |   |
|               | t  | [N·m <sup>-2</sup> ] | 0,0001                                               |        | 0,0217 |        | 0,0189 |        |        |      |    |   |
| 28            | V* | [m·s <sup>-1</sup> ] | 0,0046                                               |        | 0,0044 |        | 0,0092 |        | 0,0009 |      |    |   |
|               | t  | [N·m <sup>-2</sup> ] | 0,0214                                               |        | 0,0194 |        | 0,0843 |        | 0,0008 |      |    |   |



|               |    |                      | 25.09.2019 Q = 0.093 m <sup>3</sup> ·s <sup>-1</sup> |        |        |        |        |        |        |      |    |   |
|---------------|----|----------------------|------------------------------------------------------|--------|--------|--------|--------|--------|--------|------|----|---|
|               |    |                      | Hydrometric verticals                                |        |        |        |        |        |        |      |    |   |
| Cross-section |    |                      | I                                                    | II     | III    | IV     | V      | VI     | VII    | VIII | IX | X |
| 1             | V* | [m·s <sup>-1</sup> ] | 0,0276                                               |        | 0,0014 |        |        |        |        |      |    |   |
|               | t  | [N·m <sup>-2</sup> ] | 0,7608                                               |        | 0,0019 |        |        |        |        |      |    |   |
| 2             | V* | [m·s <sup>-1</sup> ] | 0,0072                                               |        | 0,0223 |        | 0,0030 |        |        |      |    |   |
|               | t  | [N·m <sup>-2</sup> ] | 0,0521                                               |        | 0,4963 |        | 0,0089 |        |        |      |    |   |
| 3             | V* | [m·s <sup>-1</sup> ] | 0,0005                                               |        | 0,0030 |        | 0,0046 |        |        |      |    |   |
|               | t  | [N·m <sup>-2</sup> ] | 0,0002                                               |        | 0,0089 |        | 0,0214 |        |        |      |    |   |
| 4             | V* | [m·s <sup>-1</sup> ] | 0,0015                                               |        | 0,0143 |        | 0,0179 |        | 0,0027 |      |    |   |
|               | t  | [N·m <sup>-2</sup> ] | 0,0024                                               |        | 0,2049 |        | 0,3196 |        | 0,0074 |      |    |   |
| 6             | V* | [m·s <sup>-1</sup> ] | 0,0158                                               | 0,0062 | 0,0031 | 0,0095 | 0,0135 | 0,0102 |        |      |    |   |
|               | t  | [N·m <sup>-2</sup> ] | 0,2499                                               | 0,0385 | 0,0098 | 0,0912 | 0,1817 | 0,1042 |        |      |    |   |
| 8             | V* | [m·s <sup>-1</sup> ] |                                                      | 0,0174 | 0,0122 | 0,0162 |        |        |        |      |    |   |
|               | t  | [N·m <sup>-2</sup> ] |                                                      | 0,3012 | 0,1491 | 0,2622 |        |        |        |      |    |   |
| 10            | V* | [m·s <sup>-1</sup> ] | 0,0120                                               | 0,0083 | 0,0122 | 0,0123 | 0,0063 | 0,0010 | 0,0069 |      |    |   |
|               | t  | [N·m <sup>-2</sup> ] | 0,1448                                               | 0,0694 | 0,1499 | 0,1508 | 0,0394 | 0,0009 | 0,0472 |      |    |   |
| 11            | V* | [m·s <sup>-1</sup> ] | 0,0009                                               |        | 0,0118 |        | 0,0044 |        | 0,0011 |      |    |   |
|               | t  | [N·m <sup>-2</sup> ] | 0,0009                                               |        | 0,1399 |        | 0,0195 |        | 0,0011 |      |    |   |
| 12            | V* | [m·s <sup>-1</sup> ] | 0,0018                                               |        | 0,0076 |        |        |        |        |      |    |   |
|               | t  | [N·m <sup>-2</sup> ] | 0,0031                                               |        | 0,0572 |        |        |        |        |      |    |   |
| 13            | V* | [m·s <sup>-1</sup> ] | 0,0008                                               | 0,0049 | 0,0069 | 0,0076 | 0,0123 | 0,0018 |        |      |    |   |
|               | t  | [N·m <sup>-2</sup> ] | 0,0006                                               | 0,0235 | 0,0482 | 0,0575 | 0,1520 | 0,0032 |        |      |    |   |
| 15            | V* | [m·s <sup>-1</sup> ] | 0,0100                                               | 0,0091 | 0,0095 | 0,0099 | 0,0017 |        |        |      |    |   |
|               | t  | [N·m <sup>-2</sup> ] | 0,1003                                               | 0,0821 | 0,0905 | 0,0990 | 0,0030 |        |        |      |    |   |
| 17            | V* | [m·s <sup>-1</sup> ] | 0,0022                                               | 0,0027 | 0,0080 | 0,0075 | 0,0027 | 0,0009 |        |      |    |   |
|               | t  | [N·m <sup>-2</sup> ] | 0,0048                                               | 0,0076 | 0,0634 | 0,0562 | 0,0075 | 0,0008 |        |      |    |   |
| 18            | V* | [m·s <sup>-1</sup> ] | 0,0031                                               |        | 0,0040 |        | 0,0080 |        |        |      |    |   |
|               | t  | [N·m <sup>-2</sup> ] | 0,0098                                               |        | 0,0161 |        | 0,0646 |        |        |      |    |   |
| 19            | V* | [m·s <sup>-1</sup> ] | 0,0014                                               |        | 0,0035 |        | 0,0091 |        |        |      |    |   |
|               | t  | [N·m <sup>-2</sup> ] | 0,0020                                               |        | 0,0120 |        | 0,0834 |        |        |      |    |   |
| 20            | V* | [m·s <sup>-1</sup> ] | 0,0041                                               | 0,0131 | 0,0222 | 0,0055 | 0,0038 |        |        |      |    |   |
|               | t  | [N·m <sup>-2</sup> ] | 0,0164                                               | 0,1706 | 0,4925 | 0,0304 | 0,0146 |        |        |      |    |   |
| 22            | V* | [m·s <sup>-1</sup> ] | 0,0006                                               | 0,0097 | 0,0091 | 0,0059 | 0,0044 | 0,0009 |        |      |    |   |
|               | t  | [N·m <sup>-2</sup> ] | 0,0003                                               | 0,0945 | 0,0834 | 0,0346 | 0,0194 | 0,0008 |        |      |    |   |
| 24            | V* | [m·s <sup>-1</sup> ] | 0,0016                                               | 0,0133 | 0,0051 | 0,0047 | 0,0030 | 0,0019 |        |      |    |   |
|               | t  | [N·m <sup>-2</sup> ] | 0,0027                                               | 0,1775 | 0,0256 | 0,0222 | 0,0093 | 0,0037 |        |      |    |   |
| 26            | V* | [m·s <sup>-1</sup> ] | 0,0017                                               |        | 0,0036 |        |        |        |        |      |    |   |
|               | t  | [N·m <sup>-2</sup> ] | 0,0028                                               |        | 0,0132 |        |        |        |        |      |    |   |
| 27            | V* | [m·s <sup>-1</sup> ] | 0,0003                                               |        | 0,0013 |        | 0,0007 |        |        |      |    |   |
|               | t  | [N·m <sup>-2</sup> ] | 0,0001                                               |        | 0,0016 |        | 0,0006 |        |        |      |    |   |
| 28            | V* | [m·s <sup>-1</sup> ] | 0,0052                                               |        | 0,0043 |        | 0,0041 |        | 0,0009 |      |    |   |
|               | t  | [N·m <sup>-2</sup> ] | 0,0272                                               |        | 0,0188 |        | 0,0168 |        | 0,0008 |      |    |   |

|               |    |                      | 23.10.2019 Q = 0.150 m <sup>3</sup> ·s <sup>-1</sup> |        |        |        |        |        |        |      |    |   |
|---------------|----|----------------------|------------------------------------------------------|--------|--------|--------|--------|--------|--------|------|----|---|
|               |    |                      | Hydrometric verticals                                |        |        |        |        |        |        |      |    |   |
| Cross-section |    |                      | I                                                    | II     | III    | IV     | V      | VI     | VII    | VIII | IX | X |
| 1             | V* | [m·s <sup>-1</sup> ] | 0,0081                                               |        | 0,0095 |        | 0,0005 |        | 0,0012 |      |    |   |
|               | t  | [N·m <sup>-2</sup> ] | 0,0651                                               |        | 0,0905 |        | 0,0002 |        | 0,0014 |      |    |   |
| 2             | V* | [m·s <sup>-1</sup> ] | 0,0097                                               |        | 0,0163 |        | 0,0038 |        |        |      |    |   |
|               | t  | [N·m <sup>-2</sup> ] | 0,0938                                               |        | 0,2644 |        | 0,0144 |        |        |      |    |   |
| 3             | V* | [m·s <sup>-1</sup> ] | 0,0013                                               |        | 0,0050 |        | 0,0038 |        |        |      |    |   |
|               | t  | [N·m <sup>-2</sup> ] | 0,0018                                               |        | 0,0254 |        | 0,0144 |        |        |      |    |   |
| 4             | V* | [m·s <sup>-1</sup> ] | 0,0034                                               |        | 0,0036 |        | 0,0220 |        | 0,0007 |      |    |   |
|               | t  | [N·m <sup>-2</sup> ] | 0,0116                                               |        | 0,0130 |        | 0,4825 |        | 0,0005 |      |    |   |
| 6             | V* | [m·s <sup>-1</sup> ] | 0,0023                                               | 0,0071 | 0,0191 | 0,0122 | 0,0153 | 0,0082 | 0,0202 |      |    |   |
|               | t  | [N·m <sup>-2</sup> ] | 0,0052                                               | 0,0501 | 0,3646 | 0,1478 | 0,2348 | 0,0665 | 0,4070 |      |    |   |
| 8             | V* | [m·s <sup>-1</sup> ] | 0,0059                                               | 0,0129 | 0,0401 | 0,0098 | 0,0089 | 0,0056 | 0,0017 |      |    |   |
|               | t  | [N·m <sup>-2</sup> ] | 0,0354                                               | 0,1670 | 1,6084 | 0,0959 | 0,0784 | 0,0312 | 0,0030 |      |    |   |
| 10            | V* | [m·s <sup>-1</sup> ] | 0,0019                                               | 0,0140 | 0,0192 | 0,0122 | 0,0110 | 0,0097 | 0,0066 |      |    |   |
|               | t  | [N·m <sup>-2</sup> ] | 0,0037                                               | 0,1970 | 0,3680 | 0,1478 | 0,1212 | 0,0938 | 0,0432 |      |    |   |
| 11            | V* | [m·s <sup>-1</sup> ] | 0,0023                                               |        | 0,0074 |        | 0,0065 |        | 0,0010 |      |    |   |
|               | t  | [N·m <sup>-2</sup> ] | 0,0054                                               |        | 0,0549 |        | 0,0425 |        | 0,0009 |      |    |   |
| 12            | V* | [m·s <sup>-1</sup> ] | 0,0028                                               |        | 0,0068 |        | 0,0020 |        | 0,0024 |      |    |   |
|               | t  | [N·m <sup>-2</sup> ] | 0,0076                                               |        | 0,0458 |        | 0,0041 |        | 0,0059 |      |    |   |
| 13            | V* | [m·s <sup>-1</sup> ] | 0,0058                                               | 0,0125 | 0,0303 | 0,0106 | 0,0031 | 0,0017 | 0,0012 |      |    |   |
|               | t  | [N·m <sup>-2</sup> ] | 0,0331                                               | 0,1572 | 0,9178 | 0,1125 | 0,0094 | 0,0030 | 0,0014 |      |    |   |
| 15            | V* | [m·s <sup>-1</sup> ] | 0,0122                                               | 0,0124 | 0,0079 | 0,0119 | 0,0019 | 0,0009 |        |      |    |   |
|               | t  | [N·m <sup>-2</sup> ] | 0,1486                                               | 0,1542 | 0,0626 | 0,1415 | 0,0037 | 0,0008 |        |      |    |   |
| 17            | V* | [m·s <sup>-1</sup> ] | 0,0003                                               | 0,0039 | 0,0115 | 0,0213 | 0,0077 | 0,0010 | 0,0010 |      |    |   |
|               | t  | [N·m <sup>-2</sup> ] | 0,0001                                               | 0,0149 | 0,1322 | 0,4517 | 0,0591 | 0,0009 | 0,0011 |      |    |   |
| 18            | V* | [m·s <sup>-1</sup> ] | 0,0025                                               |        | 0,0102 |        | 0,0014 |        | 0,0010 |      |    |   |
|               | t  | [N·m <sup>-2</sup> ] | 0,0062                                               |        | 0,1035 |        | 0,0019 |        | 0,0011 |      |    |   |
| 19            | V* | [m·s <sup>-1</sup> ] | 0,0010                                               |        | 0,0062 |        | 0,0082 |        |        |      |    |   |
|               | t  | [N·m <sup>-2</sup> ] | 0,0010                                               |        | 0,0383 |        | 0,0668 |        |        |      |    |   |
| 20            | V* | [m·s <sup>-1</sup> ] | 0,0051                                               | 0,0055 | 0,0098 | 0,0053 | 0,0118 | 0,0053 |        |      |    |   |
|               | t  | [N·m <sup>-2</sup> ] | 0,0265                                               | 0,0300 | 0,0969 | 0,0276 | 0,1399 | 0,0276 |        |      |    |   |
| 22            | V* | [m·s <sup>-1</sup> ] | 0,0018                                               | 0,0079 | 0,0055 | 0,0180 | 0,0172 | 0,0081 |        |      |    |   |
|               | t  | [N·m <sup>-2</sup> ] | 0,0031                                               | 0,0623 | 0,0298 | 0,3246 | 0,2964 | 0,0648 |        |      |    |   |
| 24            | V* | [m·s <sup>-1</sup> ] | 0,0010                                               | 0,0173 | 0,0033 | 0,0286 | 0,0041 | 0,0070 | 0,0061 |      |    |   |
|               | t  | [N·m <sup>-2</sup> ] | 0,0011                                               | 0,2994 | 0,0107 | 0,8165 | 0,0170 | 0,0491 | 0,0373 |      |    |   |
| 26            | V* | [m·s <sup>-1</sup> ] | 0,0037                                               |        | 0,0065 |        | 0,0034 |        |        |      |    |   |
|               | t  | [N·m <sup>-2</sup> ] | 0,0135                                               |        | 0,0428 |        | 0,0113 |        |        |      |    |   |
| 27            | V* | [m·s <sup>-1</sup> ] | 0,0020                                               |        | 0,0111 |        | 0,0063 |        |        |      |    |   |
|               | t  | [N·m <sup>-2</sup> ] | 0,0039                                               |        | 0,1243 |        | 0,0401 |        |        |      |    |   |
| 28            | V* | [m·s <sup>-1</sup> ] | 0,0051                                               |        | 0,0191 |        | 0,0042 |        | 0,0026 |      |    |   |
|               | t  | [N·m <sup>-2</sup> ] | 0,0261                                               |        | 0,3660 |        | 0,0179 |        | 0,0065 |      |    |   |



|               |    |                      | 07.07.2020 Q = 0.176 m <sup>3</sup> ·s <sup>-1</sup> |        |        |        |        |        |        |        |    |   |
|---------------|----|----------------------|------------------------------------------------------|--------|--------|--------|--------|--------|--------|--------|----|---|
|               |    |                      | Hydrometric verticals                                |        |        |        |        |        |        |        |    |   |
| Cross-section |    |                      | I                                                    | II     | III    | IV     | V      | VI     | VII    | VIII   | IX | X |
| 1             | V* | [m·s <sup>-1</sup> ] | 0,0007                                               |        | 0,0036 |        | 0,0043 |        | 0,0015 |        |    |   |
|               | t  | [N·m <sup>-2</sup> ] | 0,0005                                               |        | 0,0132 |        | 0,0183 |        | 0,0022 |        |    |   |
| 2             | V* | [m·s <sup>-1</sup> ] | 0,0017                                               |        | 0,0021 |        | 0,0067 |        | 0,0005 |        |    |   |
|               | t  | [N·m <sup>-2</sup> ] | 0,0028                                               |        | 0,0044 |        | 0,0446 |        | 0,0003 |        |    |   |
| 3             | V* | [m·s <sup>-1</sup> ] | 0,0026                                               |        | 0,0030 |        | 0,0069 |        |        |        |    |   |
|               | t  | [N·m <sup>-2</sup> ] | 0,0065                                               |        | 0,0091 |        | 0,0477 |        |        |        |    |   |
| 4             | V* | [m·s <sup>-1</sup> ] | 0,0016                                               |        | 0,0065 |        | 0,0244 |        | 0,0005 |        |    |   |
|               | t  | [N·m <sup>-2</sup> ] | 0,0024                                               |        | 0,0416 |        | 0,5962 |        | 0,0003 |        |    |   |
| 6             | V* | [m·s <sup>-1</sup> ] | 0,0035                                               | 0,0002 | 0,0014 | 0,0120 | 0,0057 | 0,0131 | 0,0038 | 0,0003 |    |   |
|               | t  | [N·m <sup>-2</sup> ] | 0,0121                                               | 0,0001 | 0,0019 | 0,1440 | 0,0329 | 0,1706 | 0,0146 | 0,0001 |    |   |
| 8             | V* | [m·s <sup>-1</sup> ] | 0,0055                                               | 0,0093 | 0,0054 | 0,0120 | 0,0064 | 0,0016 | 0,0046 | 0,0034 |    |   |
|               | t  | [N·m <sup>-2</sup> ] | 0,0306                                               | 0,0856 | 0,0293 | 0,1432 | 0,0414 | 0,0024 | 0,0216 | 0,0116 |    |   |
| 10            | V* | [m·s <sup>-1</sup> ] | 0,0760                                               | 0,0035 | 0,0138 | 0,0135 | 0,0080 | 0,0074 | 0,0016 | 0,0002 |    |   |
|               | t  | [N·m <sup>-2</sup> ] | 0,0132                                               | 0,0125 | 0,1907 | 0,1817 | 0,0634 | 0,0551 | 0,0025 | 0,0000 |    |   |
| 11            | V* | [m·s <sup>-1</sup> ] | 0,0130                                               |        | 0,0052 |        | 0,0005 |        | 0,0003 |        |    |   |
|               | t  | [N·m <sup>-2</sup> ] | 0,1692                                               |        | 0,0269 |        | 0,0002 |        | 0,0001 |        |    |   |
| 12            | V* | [m·s <sup>-1</sup> ] | 0,0027                                               |        | 0,0034 |        | 0,0020 |        | 0,0005 |        |    |   |
|               | t  | [N·m <sup>-2</sup> ] | 0,0075                                               |        | 0,0116 |        | 0,0041 |        | 0,0003 |        |    |   |
| 13            | V* | [m·s <sup>-1</sup> ] | 0,0042                                               | 0,0237 | 0,0091 | 0,0036 | 0,0007 | 0,0040 | 0,0014 |        |    |   |
|               | t  | [N·m <sup>-2</sup> ] | 0,0174                                               | 0,5594 | 0,0824 | 0,0132 | 0,0005 | 0,0163 | 0,0019 |        |    |   |
| 15            | V* | [m·s <sup>-1</sup> ] | 0,0107                                               | 0,0080 | 0,0041 | 0,0102 | 0,0012 | 0,0057 |        |        |    |   |
|               | t  | [N·m <sup>-2</sup> ] | 0,1148                                               | 0,0643 | 0,0166 | 0,1046 | 0,0015 | 0,0329 |        |        |    |   |
| 17            | V* | [m·s <sup>-1</sup> ] | 0,0015                                               | 0,0013 | 0,0039 | 0,0148 | 0,0034 | 0,0083 |        |        |    |   |
|               | t  | [N·m <sup>-2</sup> ] | 0,0023                                               | 0,0017 | 0,0156 | 0,2185 | 0,0119 | 0,0682 |        |        |    |   |
| 18            | V* | [m·s <sup>-1</sup> ] | 0,0017                                               |        | 0,0003 |        | 0,0129 |        | 0,0045 |        |    |   |
|               | t  | [N·m <sup>-2</sup> ] | 0,0030                                               |        | 0,0001 |        | 0,1652 |        | 0,0206 |        |    |   |
| 19            | V* | [m·s <sup>-1</sup> ] |                                                      |        | 0,0016 |        | 0,0104 |        |        |        |    |   |
|               | t  | [N·m <sup>-2</sup> ] |                                                      |        | 0,0024 |        | 0,1082 |        |        |        |    |   |
| 20            | V* | [m·s <sup>-1</sup> ] | 0,0012                                               | 0,0005 | 0,0035 | 0,0110 | 0,0071 | 0,0027 | 0,0075 |        |    |   |
|               | t  | [N·m <sup>-2</sup> ] | 0,0015                                               | 0,0002 | 0,0126 | 0,1204 | 0,0511 | 0,0076 | 0,0567 |        |    |   |
| 22            | V* | [m·s <sup>-1</sup> ] | 0,0017                                               | 0,0007 | 0,0044 | 0,0012 | 0,0106 | 0,0014 |        |        |    |   |
|               | t  | [N·m <sup>-2</sup> ] | 0,0028                                               | 0,0005 | 0,0192 | 0,0015 | 0,1125 | 0,0021 |        |        |    |   |
| 24            | V* | [m·s <sup>-1</sup> ] | 0,0001                                               |        | 0,0163 |        | 0,0064 |        | 0,0007 |        |    |   |
|               | t  | [N·m <sup>-2</sup> ] | 0,0000                                               |        | 0,2661 |        | 0,0414 |        | 0,0005 |        |    |   |
| 26            | V* | [m·s <sup>-1</sup> ] |                                                      |        |        |        |        |        |        |        |    |   |
|               | t  | [N·m <sup>-2</sup> ] |                                                      |        |        |        |        |        |        |        |    |   |
| 27            | V* | [m·s <sup>-1</sup> ] | 0,0000                                               |        | 0,0048 |        | 0,0026 |        |        |        |    |   |
|               | t  | [N·m <sup>-2</sup> ] | 0,0000                                               |        | 0,0227 |        | 0,0065 |        |        |        |    |   |
| 28            | V* | [m·s <sup>-1</sup> ] | 0,0046                                               |        | 0,0002 |        | 0,0051 |        | 0,0003 |        |    |   |
|               | t  | [N·m <sup>-2</sup> ] | 0,0211                                               |        | 0,0001 |        | 0,0256 |        | 0,0001 |        |    |   |

|               |    |                      | 22.09.2020 Q = 0.257 m <sup>3</sup> ·s <sup>-1</sup> |        |        |        |        |        |        |        |    |   |
|---------------|----|----------------------|------------------------------------------------------|--------|--------|--------|--------|--------|--------|--------|----|---|
|               |    |                      | Hydrometric verticals                                |        |        |        |        |        |        |        |    |   |
| Cross-section |    |                      | I                                                    | II     | III    | IV     | V      | VI     | VII    | VIII   | IX | X |
| 1             | V* | [m·s <sup>-1</sup> ] | 0,0012                                               |        | 0,0087 |        | 0,0021 |        | 0,0051 |        |    |   |
|               | t  | [N·m <sup>-2</sup> ] | 0,0015                                               |        | 0,0765 |        | 0,0044 |        | 0,0256 |        |    |   |
| 2             | V* | [m·s <sup>-1</sup> ] | 0,0031                                               |        | 0,0052 |        | 0,0113 |        | 0,0019 |        |    |   |
|               | t  | [N·m <sup>-2</sup> ] | 0,0097                                               |        | 0,0269 |        | 0,1278 |        | 0,0035 |        |    |   |
| 3             | V* | [m·s <sup>-1</sup> ] | 0,0015                                               |        | 0,0077 |        | 0,0113 |        |        |        |    |   |
|               | t  | [N·m <sup>-2</sup> ] | 0,0023                                               |        | 0,0596 |        | 0,1278 |        |        |        |    |   |
| 4             | V* | [m·s <sup>-1</sup> ] | 0,0001                                               |        | 0,0214 |        | 0,0130 |        |        |        |    |   |
|               | t  | [N·m <sup>-2</sup> ] | 0,0000                                               |        | 0,4576 |        | 0,1701 |        |        |        |    |   |
| 6             | V* | [m·s <sup>-1</sup> ] | 0,0085                                               | 0,0024 | 0,0022 | 0,0030 | 0,0008 | 0,0068 | 0,0078 | 0,0055 |    |   |
|               | t  | [N·m <sup>-2</sup> ] | 0,0729                                               | 0,0059 | 0,0047 | 0,0087 | 0,0007 | 0,0458 | 0,0602 | 0,0300 |    |   |
| 8             | V* | [m·s <sup>-1</sup> ] | 0,0021                                               | 0,0018 | 0,0138 | 0,0056 | 0,0113 | 0,0073 | 0,0043 | 0,0036 |    |   |
|               | t  | [N·m <sup>-2</sup> ] | 0,0044                                               | 0,0031 | 0,1902 | 0,0312 | 0,1278 | 0,0526 | 0,0189 | 0,0132 |    |   |
| 10            | V* | [m·s <sup>-1</sup> ] | 0,0069                                               | 0,0063 | 0,0057 | 0,0129 | 0,0160 | 0,0010 | 0,0038 | 0,0013 |    |   |
|               | t  | [N·m <sup>-2</sup> ] | 0,0470                                               | 0,0399 | 0,0319 | 0,1674 | 0,2549 | 0,0011 | 0,0146 | 0,0016 |    |   |
| 11            | V* | [m·s <sup>-1</sup> ] | 0,0047                                               |        | 0,0252 |        | 0,0094 |        | 0,0002 |        |    |   |
|               | t  | [N·m <sup>-2</sup> ] | 0,0225                                               |        | 0,6368 |        | 0,0875 |        | 0,0001 |        |    |   |
| 12            | V* | [m·s <sup>-1</sup> ] | 0,0014                                               |        | 0,0010 |        | 0,0015 |        | 0,0003 |        |    |   |
|               | t  | [N·m <sup>-2</sup> ] | 0,0019                                               |        | 0,0011 |        | 0,0024 |        | 0,0001 |        |    |   |
| 13            | V* | [m·s <sup>-1</sup> ] | 0,0060                                               | 0,0090 | 0,0141 | 0,0057 | 0,0018 | 0,0034 | 0,0040 | 0,0073 |    |   |
|               | t  | [N·m <sup>-2</sup> ] | 0,0356                                               | 0,0808 | 0,1975 | 0,0321 | 0,0031 | 0,0116 | 0,0160 | 0,0528 |    |   |
| 15            | V* | [m·s <sup>-1</sup> ] | 0,0204                                               | 0,0319 | 0,0063 | 0,0065 | 0,0115 | 0,0019 | 0,0013 |        |    |   |
|               | t  | [N·m <sup>-2</sup> ] | 0,4176                                               | 1,0151 | 0,0394 | 0,0425 | 0,1330 | 0,0035 | 0,0017 |        |    |   |
| 17            | V* | [m·s <sup>-1</sup> ] | 0,0028                                               | 0,0093 | 0,0042 | 0,0109 | 0,0052 | 0,0105 |        |        |    |   |
|               | t  | [N·m <sup>-2</sup> ] | 0,0077                                               | 0,0866 | 0,0174 | 0,1185 | 0,0274 | 0,1092 |        |        |    |   |
| 18            | V* | [m·s <sup>-1</sup> ] |                                                      |        | 0,0033 |        | 0,0053 |        | 0,0091 |        |    |   |
|               | t  | [N·m <sup>-2</sup> ] |                                                      |        | 0,0107 |        | 0,0278 |        | 0,0824 |        |    |   |
| 19            | V* | [m·s <sup>-1</sup> ] | 0,0002                                               |        | 0,0013 |        | 0,0029 |        | 0,0114 |        |    |   |
|               | t  | [N·m <sup>-2</sup> ] | 0,0000                                               |        | 0,0016 |        | 0,0082 |        | 0,1310 |        |    |   |
| 20            | V* | [m·s <sup>-1</sup> ] | 0,0009                                               | 0,0041 | 0,0183 | 0,0149 | 0,0040 | 0,0051 | 0,0031 |        |    |   |
|               | t  | [N·m <sup>-2</sup> ] | 0,0007                                               | 0,0170 | 0,3347 | 0,2232 | 0,0161 | 0,0261 | 0,0098 |        |    |   |
| 22            | V* | [m·s <sup>-1</sup> ] | 0,0062                                               | 0,0038 | 0,0072 | 0,0109 | 0,0000 | 0,0005 |        |        |    |   |
|               | t  | [N·m <sup>-2</sup> ] | 0,0385                                               | 0,0144 | 0,0523 | 0,1193 | 0,0000 | 0,0003 |        |        |    |   |
| 24            | V* | [m·s <sup>-1</sup> ] | 0,0099                                               | 0,0130 | 0,0168 | 0,0007 |        | 0,0010 |        |        |    |   |
|               | t  | [N·m <sup>-2</sup> ] | 0,0976                                               | 0,1692 | 0,2828 | 0,0005 |        | 0,0011 |        |        |    |   |
| 26            | V* | [m·s <sup>-1</sup> ] |                                                      |        |        |        |        |        |        |        |    |   |
|               | t  | [N·m <sup>-2</sup> ] |                                                      |        |        |        |        |        |        |        |    |   |
| 27            | V* | [m·s <sup>-1</sup> ] |                                                      |        |        |        |        |        |        |        |    |   |
|               | t  | [N·m <sup>-2</sup> ] |                                                      |        |        |        |        |        |        |        |    |   |
| 28            | V* | [m·s <sup>-1</sup> ] | 0,0045                                               |        | 0,0077 |        | 0,0068 |        |        |        |    |   |
|               | t  | [N·m <sup>-2</sup> ] | 0,0206                                               |        | 0,0596 |        | 0,0460 |        |        |        |    |   |

|               |    |                      | 06.07.2021 Q = 0.164 m <sup>3</sup> ·s <sup>-1</sup> |        |        |        |        |        |        |      |    |   |
|---------------|----|----------------------|------------------------------------------------------|--------|--------|--------|--------|--------|--------|------|----|---|
|               |    |                      | Hydrometric verticals                                |        |        |        |        |        |        |      |    |   |
| Cross-section |    |                      | I                                                    | II     | III    | IV     | V      | VI     | VII    | VIII | IX | X |
| 1             | V* | [m·s <sup>-1</sup> ] | 0,0001                                               |        | 0,0075 |        | 0,0045 |        | 0,0009 |      |    |   |
|               | t  | [N·m <sup>-2</sup> ] | 0,0000                                               |        | 0,0559 |        | 0,0204 |        | 0,0008 |      |    |   |
| 2             | V* | [m·s <sup>-1</sup> ] | 0,0012                                               |        | 0,0048 |        | 0,0018 |        | 0,0001 |      |    |   |
|               | t  | [N·m <sup>-2</sup> ] | 0,0014                                               |        | 0,0227 |        | 0,0033 |        | 0,0000 |      |    |   |
| 3             | V* | [m·s <sup>-1</sup> ] | 0,0004                                               |        | 0,0067 |        | 0,0018 |        | 0,0009 |      |    |   |
|               | t  | [N·m <sup>-2</sup> ] | 0,0001                                               |        | 0,0453 |        | 0,0033 |        | 0,0008 |      |    |   |
| 4             | V* | [m·s <sup>-1</sup> ] | 0,0005                                               |        | 0,0105 |        | 0,0011 |        | 0,0035 |      |    |   |
|               | t  | [N·m <sup>-2</sup> ] | 0,0003                                               |        | 0,1103 |        | 0,0013 |        | 0,0122 |      |    |   |
| 6             | V* | [m·s <sup>-1</sup> ] | 0,0031                                               | 0,0258 | 0,0062 | 0,0058 | 0,0071 |        |        |      |    |   |
|               | t  | [N·m <sup>-2</sup> ] | 0,0098                                               | 0,6643 | 0,0388 | 0,0333 | 0,0508 |        |        |      |    |   |
| 8             | V* | [m·s <sup>-1</sup> ] | 0,0018                                               | 0,0014 | 0,0064 | 0,0022 | 0,0049 | 0,0016 |        |      |    |   |
|               | t  | [N·m <sup>-2</sup> ] | 0,0031                                               | 0,0019 | 0,0407 | 0,0047 | 0,0237 | 0,0024 |        |      |    |   |
| 10            | V* | [m·s <sup>-1</sup> ] | 0,0057                                               | 0,0014 | 0,0031 | 0,0023 | 0,0236 | 0,0110 | 0,0019 |      |    |   |
|               | t  | [N·m <sup>-2</sup> ] | 0,0329                                               | 0,0020 | 0,0098 | 0,0054 | 0,5561 | 0,1212 | 0,0038 |      |    |   |
| 11            | V* | [m·s <sup>-1</sup> ] | 0,0035                                               |        | 0,0019 |        | 0,0028 |        | 0,0045 |      |    |   |
|               | t  | [N·m <sup>-2</sup> ] | 0,0121                                               |        | 0,0037 |        | 0,0077 |        | 0,0204 |      |    |   |
| 12            | V* | [m·s <sup>-1</sup> ] | 0,0049                                               |        | 0,0026 |        | 0,0012 |        |        |      |    |   |
|               | t  | [N·m <sup>-2</sup> ] | 0,0241                                               |        | 0,0069 |        | 0,0014 |        |        |      |    |   |
| 13            | V* | [m·s <sup>-1</sup> ] | 0,0146                                               | 0,0014 | 0,0117 | 0,0079 | 0,0005 | 0,0015 | 0,0017 |      |    |   |
|               | t  | [N·m <sup>-2</sup> ] | 0,2134                                               | 0,0018 | 0,1358 | 0,0626 | 0,0002 | 0,0024 | 0,0030 |      |    |   |
| 15            | V* | [m·s <sup>-1</sup> ] | 0,0193                                               | 0,0059 | 0,0078 | 0,0060 | 0,0016 |        |        |      |    |   |
|               | t  | [N·m <sup>-2</sup> ] | 0,3727                                               | 0,0350 | 0,0610 | 0,0362 | 0,0024 |        |        |      |    |   |
| 17            | V* | [m·s <sup>-1</sup> ] | 0,0078                                               | 0,0246 | 0,0082 | 0,0081 | 0,0105 | 0,0059 |        |      |    |   |
|               | t  | [N·m <sup>-2</sup> ] | 0,0612                                               | 0,6030 | 0,0665 | 0,0657 | 0,1111 | 0,0350 |        |      |    |   |
| 18            | V* | [m·s <sup>-1</sup> ] | 0,0005                                               |        | 0,0075 |        | 0,0039 |        | 0,0055 |      |    |   |
|               | t  | [N·m <sup>-2</sup> ] | 0,0002                                               |        | 0,0559 |        | 0,0150 |        | 0,0302 |      |    |   |
| 19            | V* | [m·s <sup>-1</sup> ] | 0,0047                                               |        | 0,0087 |        | 0,0097 |        |        |      |    |   |
|               | t  | [N·m <sup>-2</sup> ] | 0,0220                                               |        | 0,0765 |        | 0,0942 |        |        |      |    |   |
| 20            | V* | [m·s <sup>-1</sup> ] | 0,0007                                               | 0,0052 | 0,0080 | 0,0143 |        |        |        |      |    |   |
|               | t  | [N·m <sup>-2</sup> ] | 0,0005                                               | 0,0272 | 0,0643 | 0,2034 |        |        |        |      |    |   |
| 22            | V* | [m·s <sup>-1</sup> ] | 0,0018                                               | 0,0028 | 0,0041 | 0,0416 | 0,0097 | 0,0037 |        |      |    |   |
|               | t  | [N·m <sup>-2</sup> ] | 0,0031                                               | 0,0077 | 0,0170 | 1,7306 | 0,0932 | 0,0139 |        |      |    |   |
| 24            | V* | [m·s <sup>-1</sup> ] | 0,0024                                               | 0,0094 | 0,0077 | 0,0042 |        |        |        |      |    |   |
|               | t  | [N·m <sup>-2</sup> ] | 0,0059                                               | 0,0892 | 0,0586 | 0,0173 |        |        |        |      |    |   |
| 26            | V* | [m·s <sup>-1</sup> ] | 0,0082                                               |        | 0,0120 |        |        |        |        |      |    |   |
|               | t  | [N·m <sup>-2</sup> ] | 0,0674                                               |        | 0,1448 |        |        |        |        |      |    |   |
| 27            | V* | [m·s <sup>-1</sup> ] | 0,0020                                               |        | 0,0196 |        |        |        |        |      |    |   |
|               | t  | [N·m <sup>-2</sup> ] | 0,0041                                               |        | 0,3855 |        |        |        |        |      |    |   |
| 28            | V* | [m·s <sup>-1</sup> ] | 0,0006                                               |        | 0,0078 |        | 0,0062 |        | 0,0027 |      |    |   |
|               | t  | [N·m <sup>-2</sup> ] | 0,0004                                               |        | 0,0602 |        | 0,0388 |        | 0,0075 |      |    |   |

|               |    |                      | 10.11.2021 Q = 0.309 m <sup>3</sup> ·s <sup>-1</sup> |        |        |        |        |        |        |        |    |   |
|---------------|----|----------------------|------------------------------------------------------|--------|--------|--------|--------|--------|--------|--------|----|---|
|               |    |                      | Hydrometric verticals                                |        |        |        |        |        |        |        |    |   |
| Cross-section |    |                      | I                                                    | II     | III    | IV     | V      | VI     | VII    | VIII   | IX | X |
| 1             | V* | [m·s <sup>-1</sup> ] | 0,0021                                               |        | 0,0067 |        | 0,0012 |        | 0,0002 |        |    |   |
|               | t  | [N·m <sup>-2</sup> ] | 0,0044                                               |        | 0,0455 |        | 0,0015 |        | 0,0000 |        |    |   |
| 2             | V* | [m·s <sup>-1</sup> ] | 0,0046                                               |        | 0,0016 |        | 0,0052 |        | 0,0231 |        |    |   |
|               | t  | [N·m <sup>-2</sup> ] | 0,0214                                               |        | 0,0024 |        | 0,0272 |        | 0,5350 |        |    |   |
| 3             | V* | [m·s <sup>-1</sup> ] | 0,0026                                               |        | 0,0300 |        | 0,0070 |        |        |        |    |   |
|               | t  | [N·m <sup>-2</sup> ] | 0,0070                                               |        | 0,8990 |        | 0,0484 |        |        |        |    |   |
| 4             | V* | [m·s <sup>-1</sup> ] | 0,0012                                               |        | 0,0031 |        | 0,0424 |        | 0,0038 |        |    |   |
|               | t  | [N·m <sup>-2</sup> ] | 0,0014                                               |        | 0,0094 |        | 1,7992 |        | 0,0145 |        |    |   |
| 6             | V* | [m·s <sup>-1</sup> ] | 0,0363                                               | 0,0137 | 0,0082 | 0,0155 | 0,0016 |        |        |        |    |   |
|               | t  | [N·m <sup>-2</sup> ] | 1,3212                                               | 0,1883 | 0,0671 | 0,2390 | 0,0024 |        |        |        |    |   |
| 8             | V* | [m·s <sup>-1</sup> ] | 0,0035                                               | 0,0109 | 0,0107 | 0,0188 | 0,0087 | 0,0032 | 0,0085 | 0,0014 |    |   |
|               | t  | [N·m <sup>-2</sup> ] | 0,0121                                               | 0,1197 | 0,1151 | 0,3534 | 0,0750 | 0,0100 | 0,0717 | 0,0019 |    |   |
| 10            | V* | [m·s <sup>-1</sup> ] | 0,0077                                               | 0,0217 | 0,0066 | 0,0131 | 0,0149 | 0,0249 | 0,0006 |        |    |   |
|               | t  | [N·m <sup>-2</sup> ] | 0,0591                                               | 0,4726 | 0,0437 | 0,1729 | 0,2211 | 0,6185 | 0,0004 |        |    |   |
| 11            | V* | [m·s <sup>-1</sup> ] | 0,0009                                               |        | 0,0095 |        | 0,0074 |        | 0,0017 |        |    |   |
|               | t  | [N·m <sup>-2</sup> ] | 0,0009                                               |        | 0,0905 |        | 0,0546 |        | 0,0030 |        |    |   |
| 12            | V* | [m·s <sup>-1</sup> ] | 0,0017                                               |        | 0,0033 |        |        |        |        |        |    |   |
|               | t  | [N·m <sup>-2</sup> ] | 0,0030                                               |        | 0,0106 |        |        |        |        |        |    |   |
| 13            | V* | [m·s <sup>-1</sup> ] | 0,0043                                               | 0,0439 | 0,0106 | 0,0081 | 0,0033 |        |        |        |    |   |
|               | t  | [N·m <sup>-2</sup> ] | 0,0189                                               | 1,9314 | 0,1122 | 0,0651 | 0,0108 |        |        |        |    |   |
| 15            | V* | [m·s <sup>-1</sup> ] | 0,0161                                               | 0,0021 | 0,0080 | 0,0079 |        |        |        |        |    |   |
|               | t  | [N·m <sup>-2</sup> ] | 0,2577                                               | 0,0044 | 0,0640 | 0,0623 |        |        |        |        |    |   |
| 17            | V* | [m·s <sup>-1</sup> ] | 0,0016                                               | 0,0088 | 0,0053 | 0,0134 | 0,0030 |        |        |        |    |   |
|               | t  | [N·m <sup>-2</sup> ] | 0,0027                                               | 0,0771 | 0,0281 | 0,1793 | 0,0091 |        |        |        |    |   |
| 18            | V* | [m·s <sup>-1</sup> ] | 0,0024                                               |        | 0,0017 |        | 0,0133 |        | 0,0092 |        |    |   |
|               | t  | [N·m <sup>-2</sup> ] | 0,0058                                               |        | 0,0027 |        | 0,1779 |        | 0,0850 |        |    |   |
| 19            | V* | [m·s <sup>-1</sup> ] | 0,0056                                               |        | 0,0021 |        | 0,0068 |        |        |        |    |   |
|               | t  | [N·m <sup>-2</sup> ] | 0,0318                                               |        | 0,0045 |        | 0,0460 |        |        |        |    |   |
| 20            | V* | [m·s <sup>-1</sup> ] |                                                      | 0,0084 | 0,0027 | 0,0134 | 0,0055 | 0,0138 | 0,0047 |        |    |   |
|               | t  | [N·m <sup>-2</sup> ] |                                                      | 0,0711 | 0,0076 | 0,1793 | 0,0306 | 0,1892 | 0,0220 |        |    |   |
| 22            | V* | [m·s <sup>-1</sup> ] | 0,0066                                               | 0,0035 | 0,0059 | 0,0039 | 0,0102 | 0,0349 |        |        |    |   |
|               | t  | [N·m <sup>-2</sup> ] | 0,0437                                               | 0,0121 | 0,0350 | 0,0156 | 0,1035 | 1,2195 |        |        |    |   |
| 24            | V* | [m·s <sup>-1</sup> ] |                                                      | 0,0173 | 0,0205 |        |        |        |        |        |    |   |
|               | t  | [N·m <sup>-2</sup> ] |                                                      | 0,2982 | 0,4197 |        |        |        |        |        |    |   |
| 26            | V* | [m·s <sup>-1</sup> ] | 0,0171                                               |        | 0,0028 |        |        |        |        |        |    |   |
|               | t  | [N·m <sup>-2</sup> ] | 0,2929                                               |        | 0,0076 |        |        |        |        |        |    |   |
| 27            | V* | [m·s <sup>-1</sup> ] | 0,0021                                               |        | 0,0248 |        |        |        |        |        |    |   |
|               | t  | [N·m <sup>-2</sup> ] | 0,0044                                               |        | 0,6168 |        |        |        |        |        |    |   |
| 28            | V* | [m·s <sup>-1</sup> ] | 0,0004                                               |        | 0,0050 |        | 0,0129 |        | 0,0016 |        |    |   |
|               | t  | [N·m <sup>-2</sup> ] | 0,0001                                               |        | 0,0246 |        | 0,1661 |        | 0,0024 |        |    |   |

|               |    |                      | 01.06.2022      Q = 0.223 m <sup>3</sup> ·s <sup>-1</sup> |        |        |        |        |        |        |      |    |   |
|---------------|----|----------------------|-----------------------------------------------------------|--------|--------|--------|--------|--------|--------|------|----|---|
|               |    |                      | Hydrometric verticals                                     |        |        |        |        |        |        |      |    |   |
| Cross-section |    |                      | I                                                         | II     | III    | IV     | V      | VI     | VII    | VIII | IX | X |
| 1             | V* | [m·s <sup>-1</sup> ] | 0,0013                                                    |        | 0,0050 |        | 0,0046 |        |        |      |    |   |
|               | t  | [N·m <sup>-2</sup> ] | 0,0018                                                    |        | 0,0251 |        | 0,0216 |        |        |      |    |   |
| 2             | V* | [m·s <sup>-1</sup> ] | 0,0130                                                    |        | 0,0053 |        | 0,0140 |        |        |      |    |   |
|               | t  | [N·m <sup>-2</sup> ] | 0,1701                                                    |        | 0,0278 |        | 0,1970 |        |        |      |    |   |
| 3             | V* | [m·s <sup>-1</sup> ] | 0,0056                                                    |        | 0,0063 |        | 0,0142 |        |        |      |    |   |
|               | t  | [N·m <sup>-2</sup> ] | 0,0318                                                    |        | 0,0392 |        | 0,2029 |        |        |      |    |   |
| 4             | V* | [m·s <sup>-1</sup> ] | 0,0028                                                    |        | 0,0006 |        |        |        |        |      |    |   |
|               | t  | [N·m <sup>-2</sup> ] | 0,0080                                                    |        | 0,0003 |        |        |        |        |      |    |   |
| 6             | V* | [m·s <sup>-1</sup> ] | 0,0073                                                    | 0,0055 | 0,0193 | 0,0051 | 0,0150 |        |        |      |    |   |
|               | t  | [N·m <sup>-2</sup> ] | 0,0534                                                    | 0,0300 | 0,3733 | 0,0258 | 0,2242 |        |        |      |    |   |
| 8             | V* | [m·s <sup>-1</sup> ] | 0,0037                                                    | 0,0139 | 0,0177 | 0,0004 | 0,0087 | 0,0138 | 0,0041 |      |    |   |
|               | t  | [N·m <sup>-2</sup> ] | 0,0137                                                    | 0,1921 | 0,3128 | 0,0002 | 0,0753 | 0,1916 | 0,0167 |      |    |   |
| 10            | V* | [m·s <sup>-1</sup> ] | 0,0077                                                    | 0,0047 | 0,0107 | 0,0073 | 0,0028 | 0,0138 | 0,0118 |      |    |   |
|               | t  | [N·m <sup>-2</sup> ] | 0,0586                                                    | 0,0220 | 0,1151 | 0,0534 | 0,0080 | 0,1916 | 0,1382 |      |    |   |
| 11            | V* | [m·s <sup>-1</sup> ] | 0,0060                                                    |        | 0,0062 |        | 0,0035 |        | 0,0003 |      |    |   |
|               | t  | [N·m <sup>-2</sup> ] | 0,0362                                                    |        | 0,0381 |        | 0,0122 |        | 0,0001 |      |    |   |
| 12            | V* | [m·s <sup>-1</sup> ] | 0,0085                                                    |        | 0,0041 |        | 0,0031 |        |        |      |    |   |
|               | t  | [N·m <sup>-2</sup> ] | 0,0720                                                    |        | 0,0168 |        | 0,0097 |        |        |      |    |   |
| 13            | V* | [m·s <sup>-1</sup> ] | 0,0141                                                    | 0,0028 | 0,0103 | 0,0037 | 0,0017 |        |        |      |    |   |
|               | t  | [N·m <sup>-2</sup> ] | 0,1980                                                    | 0,0080 | 0,1067 | 0,0137 | 0,0030 |        |        |      |    |   |
| 15            | V* | [m·s <sup>-1</sup> ] | 0,0052                                                    | 0,0076 | 0,0030 | 0,0027 | 0,0051 |        |        |      |    |   |
|               | t  | [N·m <sup>-2</sup> ] | 0,0272                                                    | 0,0572 | 0,0091 | 0,0072 | 0,0260 |        |        |      |    |   |
| 17            | V* | [m·s <sup>-1</sup> ] | 0,0070                                                    | 0,0137 | 0,0061 | 0,0066 | 0,0030 | 0,0014 |        |      |    |   |
|               | t  | [N·m <sup>-2</sup> ] | 0,0484                                                    | 0,1888 | 0,0377 | 0,0439 | 0,0089 | 0,0019 |        |      |    |   |
| 18            | V* | [m·s <sup>-1</sup> ] |                                                           |        | 0,0011 |        | 0,0085 |        | 0,0038 |      |    |   |
|               | t  | [N·m <sup>-2</sup> ] |                                                           |        | 0,0011 |        | 0,0714 |        | 0,0146 |      |    |   |
| 19            | V* | [m·s <sup>-1</sup> ] | 0,0040                                                    |        | 0,0068 |        | 0,0183 |        |        |      |    |   |
|               | t  | [N·m <sup>-2</sup> ] | 0,0163                                                    |        | 0,0467 |        | 0,3335 |        |        |      |    |   |
| 20            | V* | [m·s <sup>-1</sup> ] | 0,0092                                                    | 0,0104 | 0,0065 | 0,0298 | 0,0021 | 0,0096 |        |      |    |   |
|               | t  | [N·m <sup>-2</sup> ] | 0,0850                                                    | 0,1089 | 0,0423 | 0,8875 | 0,0042 | 0,0915 |        |      |    |   |
| 22            | V* | [m·s <sup>-1</sup> ] | 0,0024                                                    | 0,0019 | 0,0113 | 0,0035 | 0,0053 | 0,0017 |        |      |    |   |
|               | t  | [N·m <sup>-2</sup> ] | 0,0059                                                    | 0,0037 | 0,1278 | 0,0121 | 0,0276 | 0,0030 |        |      |    |   |
| 24            | V* | [m·s <sup>-1</sup> ] | 0,0067                                                    | 0,0037 | 0,0040 | 0,0082 | 0,0089 |        |        |      |    |   |
|               | t  | [N·m <sup>-2</sup> ] | 0,0451                                                    | 0,0136 | 0,0160 | 0,0680 | 0,0787 |        |        |      |    |   |
| 26            | V* | [m·s <sup>-1</sup> ] | 0,0250                                                    |        | 0,0160 |        |        |        |        |      |    |   |
|               | t  | [N·m <sup>-2</sup> ] | 0,6263                                                    |        | 0,2566 |        |        |        |        |      |    |   |
| 27            | V* | [m·s <sup>-1</sup> ] | 0,0067                                                    |        | 0,0084 |        |        |        |        |      |    |   |
|               | t  | [N·m <sup>-2</sup> ] | 0,0451                                                    |        | 0,0700 |        |        |        |        |      |    |   |
| 28            | V* | [m·s <sup>-1</sup> ] |                                                           |        | 0,0062 |        | 0,0113 |        | 0,0031 |      |    |   |
|               | t  | [N·m <sup>-2</sup> ] |                                                           |        | 0,0388 |        | 0,1270 |        | 0,0096 |      |    |   |





|               |    |                      | 13.06.2023 Q = 0.203 m <sup>3</sup> ·s <sup>-1</sup> |        |        |        |        |        |        |      |    |   |
|---------------|----|----------------------|------------------------------------------------------|--------|--------|--------|--------|--------|--------|------|----|---|
|               |    |                      | Hydrometric verticals                                |        |        |        |        |        |        |      |    |   |
| Cross-section |    |                      | I                                                    | II     | III    | IV     | V      | VI     | VII    | VIII | IX | X |
| 1             | V* | [m·s <sup>-1</sup> ] | 0,0061                                               |        | 0,0197 |        | 0,0144 |        |        |      |    |   |
|               | t  | [N·m <sup>-2</sup> ] | 0,0377                                               |        | 0,3869 |        | 0,2064 |        |        |      |    |   |
| 2             | V* | [m·s <sup>-1</sup> ] | 0,0203                                               |        | 0,0090 |        | 0,0079 |        |        |      |    |   |
|               | t  | [N·m <sup>-2</sup> ] | 0,4140                                               |        | 0,0815 |        | 0,0623 |        |        |      |    |   |
| 3             | V* | [m·s <sup>-1</sup> ] | 0,0148                                               |        | 0,0125 |        | 0,0079 |        | 0,0045 |      |    |   |
|               | t  | [N·m <sup>-2</sup> ] | 0,2185                                               |        | 0,1559 |        | 0,0623 |        | 0,0200 |      |    |   |
| 4             | V* | [m·s <sup>-1</sup> ] | 0,0096                                               |        | 0,0054 |        | 0,0043 |        |        |      |    |   |
|               | t  | [N·m <sup>-2</sup> ] | 0,0925                                               |        | 0,0287 |        | 0,0186 |        |        |      |    |   |
| 6             | V* | [m·s <sup>-1</sup> ] | 0,0010                                               | 0,0025 | 0,0055 | 0,0122 | 0,0218 |        |        |      |    |   |
|               | t  | [N·m <sup>-2</sup> ] | 0,0011                                               | 0,0063 | 0,0302 | 0,1482 | 0,4733 |        |        |      |    |   |
| 8             | V* | [m·s <sup>-1</sup> ] | 0,0079                                               | 0,0268 | 0,0055 | 0,0224 | 0,0156 | 0,0176 | 0,0422 |      |    |   |
|               | t  | [N·m <sup>-2</sup> ] | 0,0629                                               | 0,7201 | 0,0308 | 0,5025 | 0,2428 | 0,3104 | 1,7772 |      |    |   |
| 10            | V* | [m·s <sup>-1</sup> ] | 0,0016                                               | 0,0089 | 0,0441 | 0,0163 | 0,0073 | 0,0047 | 0,0209 |      |    |   |
|               | t  | [N·m <sup>-2</sup> ] | 0,0026                                               | 0,0796 | 1,9406 | 0,2667 | 0,0536 | 0,0222 | 0,4377 |      |    |   |
| 11            | V* | [m·s <sup>-1</sup> ] | 0,0015                                               |        | 0,0176 |        | 0,0185 |        |        |      |    |   |
|               | t  | [N·m <sup>-2</sup> ] | 0,0022                                               |        | 0,3110 |        | 0,3431 |        |        |      |    |   |
| 12            | V* | [m·s <sup>-1</sup> ] | 0,0094                                               |        | 0,0015 |        |        |        |        |      |    |   |
|               | t  | [N·m <sup>-2</sup> ] | 0,0892                                               |        | 0,0023 |        |        |        |        |      |    |   |
| 13            | V* | [m·s <sup>-1</sup> ] | 0,0183                                               | 0,0126 | 0,0150 | 0,0143 |        |        |        |      |    |   |
|               | t  | [N·m <sup>-2</sup> ] | 0,3335                                               | 0,1594 | 0,2247 | 0,2044 |        |        |        |      |    |   |
| 15            | V* | [m·s <sup>-1</sup> ] | 0,0137                                               | 0,0397 | 0,0241 | 0,0045 |        |        |        |      |    |   |
|               | t  | [N·m <sup>-2</sup> ] | 0,1864                                               | 1,5723 | 0,5793 | 0,0203 |        |        |        |      |    |   |
| 17            | V* | [m·s <sup>-1</sup> ] | 0,0252                                               | 0,0009 | 0,0306 | 0,0046 | 0,0066 |        |        |      |    |   |
|               | t  | [N·m <sup>-2</sup> ] | 0,6359                                               | 0,0008 | 0,9369 | 0,0216 | 0,0437 |        |        |      |    |   |
| 18            | V* | [m·s <sup>-1</sup> ] |                                                      |        | 0,0034 |        | 0,0089 |        | 0,0026 |      |    |   |
|               | t  | [N·m <sup>-2</sup> ] |                                                      |        | 0,0116 |        | 0,0796 |        | 0,0065 |      |    |   |
| 19            | V* | [m·s <sup>-1</sup> ] | 0,0066                                               |        | 0,0197 |        | 0,0061 |        |        |      |    |   |
|               | t  | [N·m <sup>-2</sup> ] | 0,0434                                               |        | 0,3869 |        | 0,0368 |        |        |      |    |   |
| 20            | V* | [m·s <sup>-1</sup> ] | 0,0530                                               | 0,0182 | 0,0405 | 0,0167 | 0,0224 | 0,0002 |        |      |    |   |
|               | t  | [N·m <sup>-2</sup> ] | 2,8136                                               | 0,3328 | 1,6420 | 0,2782 | 0,5033 | 0,0000 |        |      |    |   |
| 22            | V* | [m·s <sup>-1</sup> ] | 0,0113                                               | 0,0127 | 0,0118 | 0,0270 | 0,0261 |        |        |      |    |   |
|               | t  | [N·m <sup>-2</sup> ] | 0,1278                                               | 0,1612 | 0,1382 | 0,7267 | 0,6796 |        |        |      |    |   |
| 24            | V* | [m·s <sup>-1</sup> ] | 0,0232                                               | 0,0039 | 0,0061 | 0,0238 |        |        |        |      |    |   |
|               | t  | [N·m <sup>-2</sup> ] | 0,5382                                               | 0,0149 | 0,0371 | 0,5677 |        |        |        |      |    |   |
| 26            | V* | [m·s <sup>-1</sup> ] | 0,0164                                               |        | 0,0087 |        |        |        |        |      |    |   |
|               | t  | [N·m <sup>-2</sup> ] | 0,2678                                               |        | 0,0756 |        |        |        |        |      |    |   |
| 27            | V* | [m·s <sup>-1</sup> ] | 0,0063                                               |        | 0,0106 |        |        |        |        |      |    |   |
|               | t  | [N·m <sup>-2</sup> ] | 0,0392                                               |        | 0,1125 |        |        |        |        |      |    |   |
| 28            | V* | [m·s <sup>-1</sup> ] | 0,0192                                               |        | 0,0117 |        | 0,0224 |        | 0,0066 |      |    |   |
|               | t  | [N·m <sup>-2</sup> ] | 0,3686                                               |        | 0,1358 |        | 0,5033 |        | 0,0437 |      |    |   |

| Design<br>cross-section |                     | 2023.06.13 |                   |
|-------------------------|---------------------|------------|-------------------|
| No. profile<br>(m)      | Field<br>(m a.s.l.) | Model      | $\Delta h$<br>(m) |
| P 28 – 155.82           | 55.63               | 55.60      | 0.03              |
| P 27 – 112.05           | 55.61               | 55.59      | 0.02              |
| P 26 – 97.11            | 55.60               | 55.58      | 0.02              |
| P 25 – 92.03            | 55.59               | 55.58      | 0.01              |
| P 24 – 87.07            | 55.59               | 55.58      | 0.01              |
| P 23 – 86.10            | 55.59               | 55.57      | 0.02              |
| P 22 – 85.11            | 55.58               | 55.57      | 0.01              |
| P 21 – 84.12            | 55.58               | 55.57      | 0.01              |
| P 20 – 83.18            | 55.58               | 55.57      | 0.01              |
| P 19 – 80.78            | 55.57               | 55.56      | 0.01              |
| P 18 – 75.78            | 55.57               | 55.56      | 0.01              |
| P 17 – 72.90            | 55.57               | 55.55      | 0.02              |
| P 16 – 71.89            | 55.57               | 55.55      | 0.02              |
| P 15 – 70.84            | 55.56               | 55.55      | 0.01              |
| P 14 – 69.87            | 55.56               | 55.55      | 0.01              |
| P 13 – 68.90            | 55.56               | 55.55      | 0.01              |
| P 12 – 65.43            | 55.55               | 55.54      | 0.01              |
| P 11 – 60.47            | 55.55               | 55.54      | 0.01              |
| P 10 – 57.51            | 55.55               | 55.54      | 0.01              |
| P 9 – 56.58             | 55.54               | 55.53      | 0.01              |
| P 8 – 55.70             | 55.54               | 55.53      | 0.01              |
| P 7 – 54.71             | 55.54               | 55.53      | 0.01              |
| P 6 – 53.75             | 55.54               | 55.52      | 0.02              |
| P 5 – 48.79             | 55.54               | 55.5       | 0.04              |
| P 4 – 43.82             | 55.52               | 55.49      | 0.03              |
| P 3 – 35.87             | 55.5                | 55.48      | 0.02              |
| P 2 – 15.77             | 55.44               | 55.47      | 0.03              |
| P 1 – 0,00              | 55.43               | 55.44      | 0.01              |
| Average                 |                     |            | 0.016             |
| SD                      |                     |            | 0.008             |
